# Supplementary material for: A Positive Regulatory Feedback Loop between EKLF/KLF1 and TAL1/SCL Sustaining the Erythropoiesis
Source: MDPI journal article supplement (doi:10.3390/ijms22158024), 2021-07-27
Supplement: s1 [file s1]

Supplementary Table S7. List of PCR primers of used for validation of the ChIP-chip data.

| ChIP-Q-PCR primers     | Sequence 5' → 3'                        |
|------------------------|-----------------------------------------|
| Actb+668L              | 5'-GAC TAC CTC ATG AAG ATC CTG AC-3'    |
| Actb+817               | 5'-CAG GGA AGA AGA GGA TGC GGC C-3'     |
| βmajor-6411            | 5'-GTT CTC TGC ACA GAT AAG GAC AAA C-3' |
| βmajor-6623            | 5'-CTG ATC CTA CCT CAC CTT ATA TGC-3'   |
| TAL1R-688              | 5'-CTC CCC GCG TGG GCT TTT GG-3'        |
| TAL1R-475              | 5'-GTG AGG ATC ACA CCC GCC CG-3'        |
| Tnfaip1 Dicer 1-F(2)   | 5'-GGT CTT GTA GTC TCT TTC CCG AT-3'    |
| Tnfaip1 Dicer 1-R(2)   | 5'-ATC CGT GGT GCC TCC C-3'             |
| Tnfaip1 Binding-F(2)   | 5'-GGG AGG CAC CAC GGA T-3'             |
| Tnfaip1 Binding-R(2)   | 5'-CGG CTC TTA TGT TTC ACC CA-3'        |
| Tnfaip1 Plasma 1-F(2)  | 5'-TGG GTG AAA CAT AAG AGC CG-3'        |
| Tnfaip1 Plasma 1-R(2)  | 5'-AGC CAA GCA GAA CAA AGC G-3'         |
| Tnfaip1 Dicer1-F(3)    | 5'-GGT CTT GTA GTC TCT TTC CCG AT-3'    |
| Tnfaip1 Dicer1-R(3)    | 5'-ATC CGT GGT GCC TCC C-3'             |
| Tnfaip1 Binding-F(3)   | 5'-GGG AGG CAC CAC GGA T-3'             |
| Tnfaip1 Binding-R(3)   | 5'-AGC CAA GCA GAA CAA AGC G-3'         |
| Tnfaip1 Plasma 1 -F(3) | 5'-CGC TTT GTT TGC TTG GCT-3'           |
| Tnfaip1 Plasma 1 -R(3) | 5'-CAG ACC AGA TTC CAC CCA G-3'         |
| NFE2 Dicer 1-F         | 5'-CAT CCC AAG GCA TCA GGC-3'           |
| NFE2 Dicer 1-R         | 5'-TTC ACC CAG TCT ACC TCT CTT TGT-3'   |
| NFE2 Binding-F         | 5'-ACA AAG AGA GGT AGA CTG GGT GAA-3'   |
| NFE2 Binding-R         | 5'-CAG AAG ACC AGA GGA TAG GGC T-3'     |

| ChIP-Q-PCR primers  | Sequence 5' → 3'                          |
|---------------------|-------------------------------------------|
| NFE2 Plasma 1-F     | 5'-AGC CCT ATC CTC TGG TCT TCT G-3'       |
| NFE2 Plasma 1-R     | 5'-TCT CCT CAT CCT GCC TCC ATA-3'         |
| E2F2 Dicer 1-F      | 5'-TCC CAG GCA GCG AAA CTC-3'             |
| E2F2 Dicer 1-R      | 5'-CAA TGC TCT CAG TCA AGT CTC TCT C-3'   |
| E2F2 Binding-F      | 5'-GAG AGA GAC TTG ACT GAG AGC ATT G-3'   |
| E2F2 Binding-R      | 5'-GTC TGC TAT TTC ACT GGT CCC TTA-3'     |
| E2F2 plasma 1-F     | 5'-TAA GGG ACC AGT GAA ATA GCA GAC-3'     |
| E2F2 plasma 1-R     | 5'-GTG AGA GGC AGA GGC AGG TAG-3'         |
| Xpo7 Dicer 1-F      | 5'-GAA GAG CAG AGC AGA GCC AGA-3'         |
| Xpo7 Dicer 1-R      | 5'-TCC TTG GTG GCT CAG TCC C-3'           |
| Xpo7 Binding-F      | 5'-GGG ACT GAG CCA CCA AGG A-3'           |
| Xpo7 Binding-R      | 5'-AGT GAC AGT GAC CTC CTC CTC CT-3'      |
| Xpo7 Plasma 1-F     | 5'-AGG AGG AGG AGG TCA CTG TCA CT-3'      |
| Xpo7 Plasma 1-R     | 5'-TCC CTC TCC CTC TTT CTC CAA C-3'       |
| PTAL1-5'D           | 5'-CTG GAT ACA GTA CAT AGA CAT TAA TAC-3' |
| PTAL1-3'D           | 5'-GCC AGA AGG TAG GTG TAT GTG-3'         |
| PTAL1-5'P           | 5'-CTA CAA TGT ACC TAT GGG CTT C-3'       |
| PTAL1-3'P           | 5'-CAT CCAACT TCT CCC CAT TGG-3'          |
| PTAL1-5'Non         | 5'-GCT GAA CGA GCA TCT GGG AGG-3'         |
| PTAL1-3'Non         | 5'-GGA TGG CCC AGG AAT GCG CAG-3'         |
| Csf2rb Dicer 1-F(1) | 5'-CCC AGC AGC CTC AAG TTA TTC-3'         |
| Csf2rb Dicer 1-R(1) | 5'-CAG TAG GCA GTG GGA GCA GTC-3'         |

| ChIP-Q-PCR primers   | Sequence 5' → 3'                      |
|----------------------|---------------------------------------|
| Csf2rb Binding-F(1)  | 5'-GAC TGC TCC CAC TGC CTA CTG-3'     |
| Csf2rb Binding-R(1)  | 5'-GAA ACA GAG AGC AGA TTG AGG AAG-3' |
| Csf2rb Plasma 1-F(1) | 5'-CTT CCT CAA TCT GCT CTC TGT TTC-3' |
| Csf2rb Plasma 1-R(1) | 5'-CAA GTC TGA GGA ATA CGC TAC CC-3'  |
| Csf2rb Dicer 1-F(2)  | 5'-GAC TGC TCC CAC TGC CTA CTG-3'     |
| Csf2rb Dicer 1-R(2)  | 5'-GAA ACA GAG AGC AGA TTG AGG AAG-3' |
| Csf2rb Binding-F(2)  | 5'-CTT CCT CAA TCT GCT CTC TGT TTC-3' |
| Csf2rb Binding-R(2)  | 5'-CAA GTC TGA GGA ATA CGC TAC CC-3'  |
| Csf2rb Plasma 1-F(2) | 5'-GGG TAG CGT ATT CCT CAG ACT TG-3'  |
| Csf2rb Plasma 1-R(2) | 5'-CCC ACT CAC CCT GTC CCA-3'         |
| Fn3k Dicer 1-F       | 5'-CAT CTT AGT GTG AGG CTG GTC G-3'   |
| Fn3k Dicer 1-R       | 5'-GCT CCT GCC TTC TCT ATG ACA A-3'   |
| Fn3k Binding-F       | 5'-TTG TCA TAG AGA AGG CAG GAG C-3'   |
| Fn3k Binding-R       | 5'-TGG GCA CAC ACA CAC ATA CAT A-3'   |
| Fn3k Plasma 1-F      | 5'-TAT GTA TGT GTG TGT GTG CCC A-3'   |
| Fn3k Plasma 1-R      | 5'-AGA GGC TAC TGT GGG AGG TGT-3'     |

**Supplementary Table S8. List of RT-PCR primers of used for validation of microarray hybridization data.**

| Name           | Forward primer                 | Reverse Primer                  |
|----------------|--------------------------------|---------------------------------|
| <i>Dcbl2</i>   | 5'-CAAGGTGATGGATGTGGACAC-3'    | 5'-GCAGCATGGGTTCCTCATG-3'       |
| <i>Pde4b</i>   | 5'-TGGAAATCCTGGCTGCCAT-3'      | 5'-TCCACAGAAGCTGTGTGCT-3'       |
| <i>Hecw1</i>   | 5'-AGCTGTCAATGCCTGTTTCAG-3'    | 5'-TCCTCCTCCAAGCCATCTTC-3'      |
| <i>Nrip3</i>   | 5'-AGGCTAAGTCTGAAGGGCTGAAG-3'  | 5'-TATCATCAACCACAGCTGCTTG-3'    |
| <i>STAT1</i>   | 5'-AAGCGAACTGGATACATCA-3'      | 5'-CCGGGACATCTCATCAAAC-3'       |
| <i>JAK3</i>    | 5'-ACTGCTGTTTCGCTTGGCAGATC-3'  | 5'-CTCTGCCAGCAGCTCCAGGAG-3'     |
| <i>STAT2</i>   | 5'-GGGACGAAGCTTTTGGGT -3'      | 5'-CTCTCGCCAGCCAACATT-3'        |
| <i>XK</i>      | 5'-TGACGCTGCTCTTCTCCTTGATG-3'  | 5'-CTTCCAGTAGTGATGTTCTGCTCC-3'  |
| <i>IL12a</i>   | 5'-TCAATCACGCTACCTCCTC-3'      | 5'-CAGAGCTTCATTTTCACTC-3'       |
| <i>IL16</i>    | 5'-AACCGAGGACAGGAACCACT-3'     | 5'-CTTGAGAGATTTGCCATTGA-3'      |
| <i>Ankrd17</i> | 5'-TCCACCAGATGTCCTCAGCTAAC-3'  | 5'-GTACTGGCTGTCCAACTATCACTCC-3' |
| <i>JAK2</i>    | 5'-GAAGGCCAATGTTCTGAAAAAAG-3'  | 5'-ACTCCGTATCTGTAGGTTCTGCTG-3'  |
| <i>STAT6</i>   | 5'-CAATGAGCCAGATGGGACCTTC-3'   | 5'-GGCTCTGAAATGAGTGGATGGA-3'    |
| <i>Tnfaip1</i> | 5'- CATGATCCGCGACGTGGAAC-3'    | 5'-GGCAGCCTTGTCCCTTGAAGA-3'     |
| <i>Ankrd1</i>  | 5'-TGGCGATCGTGGAGAAGTTAATGG-3' | 5'-GCGCACTCGTAATGACCAGTCCTC-3'  |

Supplementary Table S9. List of primers used for identification of *Tall* exon-1.

| Primer name                        | Sequence 5'→ 3'           |
|------------------------------------|---------------------------|
| Predict primer-F-1 (PF-1)          | CGAAGACAGCCTGGTCTACAGAAG  |
| Predict primer-F-2 (PF-2)          | CAAGGCTACACAGACAAACCCTATC |
| Predict primer-F3 (PF-3)           | CCAGTTTCCACCATCATAGAAAG   |
| Isoform A exon 1 primer-R-1 (AR-1) | CGTATCTCAACACCCAGTTCCTCG  |
| Isoform A exon 1 primer-R-2 (AR-2) | CAACCAACCCTCCCTTCTTCAT    |
| Isoform A exon 1 primer-R-3 (AR-3) | CTACAAACAACCCGACTCGGATC   |
| Isoform A exon 1 primer-R-4 (AR-4) | GATGCTCGTTCAGCGGCTTTG     |
